# Supplementary material for: Identification of fosaprepitant as a novel GSTP1 inhibitor through structure-based virtual screening, molecular dynamics simulation, and biological evaluation
Source: Royal Society of Chemistry journal article supplement (doi:10.1039/d1nj04597k), 2021-11-29

## Identification of fosaprepitant as a novel GSTP1 inhibitor through structure-based virtual screening, molecular dynamics simulation, and biological evaluation

Hao Lin<sup>1</sup>, Wenxiu Sun<sup>2</sup>, Tao Zeng<sup>1</sup>, Hengda Li<sup>1</sup>, Chenming Xu<sup>1</sup>, Yan Chen<sup>3</sup>, Wu Yin<sup>1,\*</sup>

<sup>1</sup>The State Key Lab of Pharmaceutical Biotechnology, College of Life Sciences, Nanjing University, Nanjing, China. wyin@nju.edu.cn

<sup>2</sup>Department of pharmacy, Lingbi people's Hospital, Suzhou, Anhui, China.

<sup>3</sup>The Affiliated cancer hospital of Nanjing Medical University, Jiangsu cancer hospital, Nanjing, China

New Journal of Chemistry

Supplementary Fig. 1

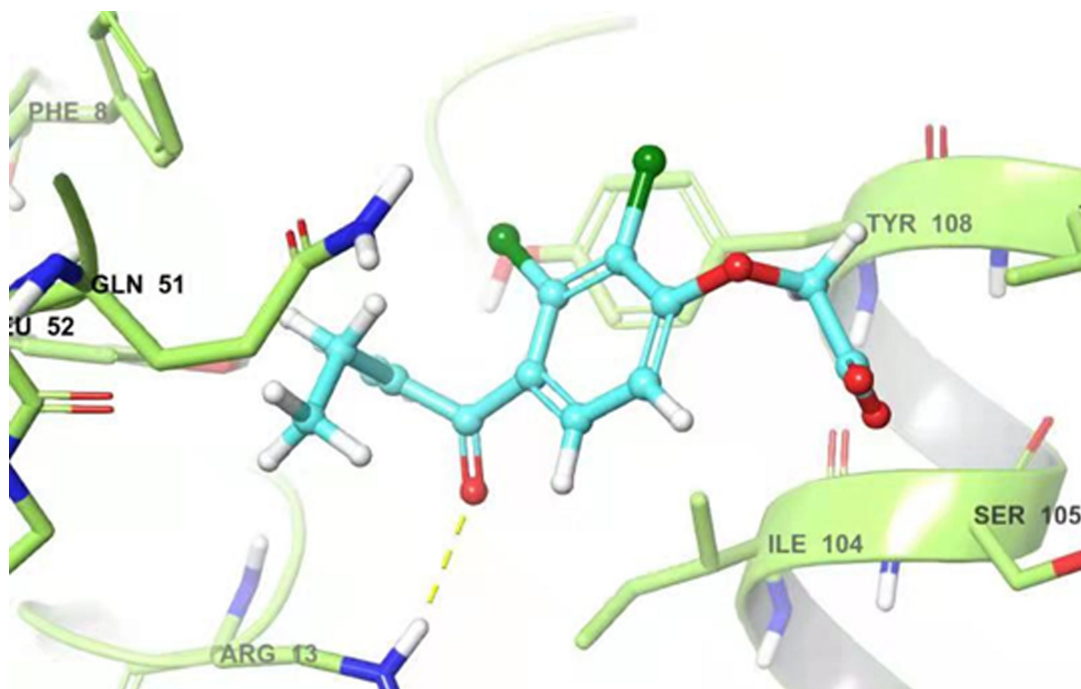

Supplementary Fig1. Binding modes of co-crystal compound ethacrynic acid(EA) with GSTP1.

Supplementary Table1: Receptor-ligand interactions of the virtual screening hits

| Title            | Receptor-ligand interactions                                                                                                                                                                                                                                                                                                                                                                                                                                                  |
|------------------|-------------------------------------------------------------------------------------------------------------------------------------------------------------------------------------------------------------------------------------------------------------------------------------------------------------------------------------------------------------------------------------------------------------------------------------------------------------------------------|
| ZINC000003939013 | <p>Diagram illustrating the receptor-ligand interactions for ZINC000003939013. The ligand is shown in stick representation, and the interacting residues are highlighted in colored circles. Key interactions include hydrogen bonds (red dashed lines) and hydrophobic contacts (green dashed lines) involving residues such as GLN 51, GLN 64, SER 65, ASN 66, GLU 91, CYS 101, ARG 13, ILE 104, GLY 12, SER 105, TYR 108, THR 109, TYR 7, PHE 8, ASN 204, and GLY 205.</p> |
| ZINC000003830431 | <p>Diagram illustrating the receptor-ligand interactions for ZINC000003830431. The ligand is shown in stick representation, and the interacting residues are highlighted in colored circles. Key interactions include hydrogen bonds (red dashed lines) and hydrophobic contacts (green dashed lines) involving residues such as ILE 104, CYS 101, SER 105, ARG 13, VAL 10, PRO 9, PHE 8, TYR 7, VAL 35, ASN 206, GLY 205, TRP 38, TYR 108, THR 109, LYS 44, and GLN 51.</p>  |
| ZINC000100004233 | <p>Diagram illustrating the receptor-ligand interactions for ZINC000100004233. The ligand is shown in stick representation, and the interacting residues are highlighted in colored circles. Key interactions include hydrogen bonds (red dashed lines) and hydrophobic contacts (green dashed lines) involving residues such as ILE 104, ARG 13, GLN 51, LEU 52, PRO 53, GLY 205, VAL 10, TYR 108, PHE 8, TYR 7, VAL 35, TRP 38, and GLN 39.</p>                             |

ZINC000003830424

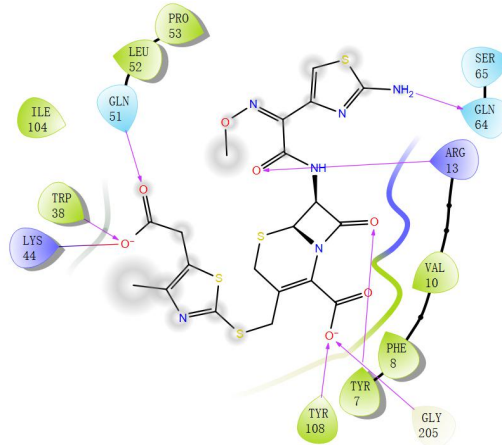

ZINC000011330186

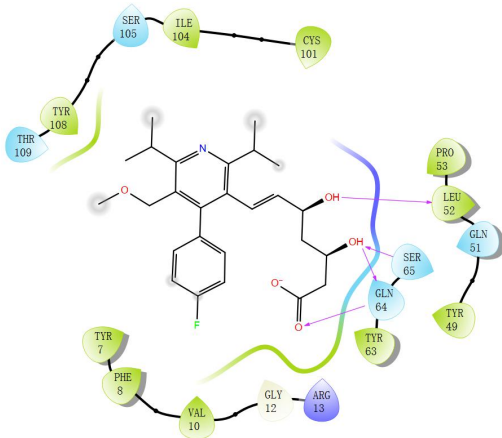

ZINC000085540215

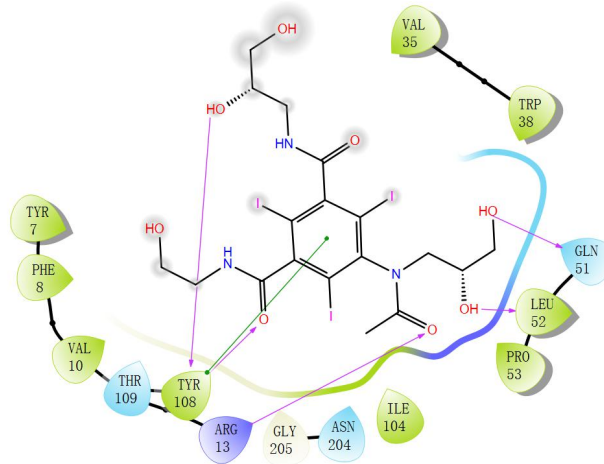

ZINC000085540223

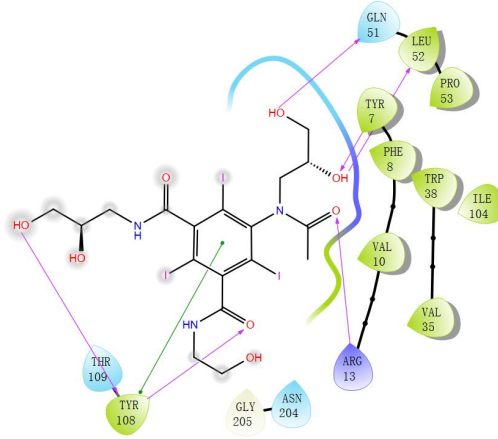

ZINC000013587680

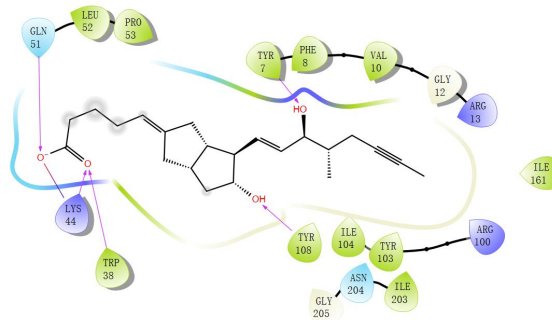

ZINC000003830957

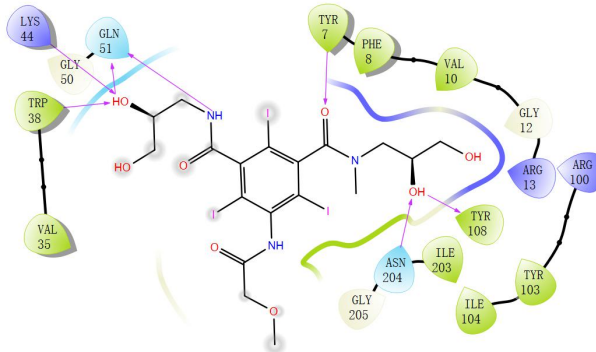

ZINC000003830430

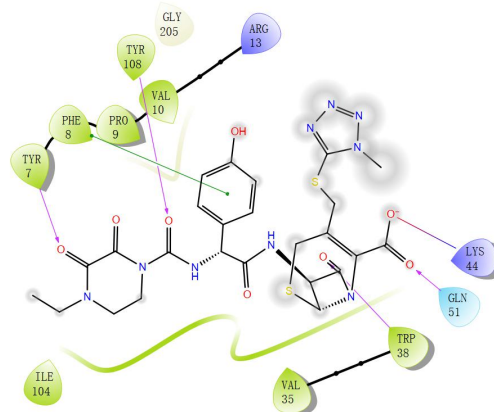

ZINC000012495062

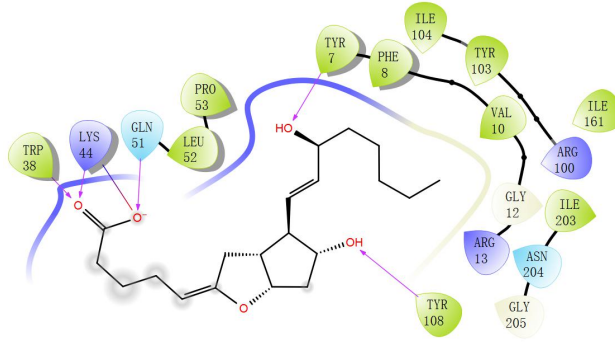

ZINC000003831357

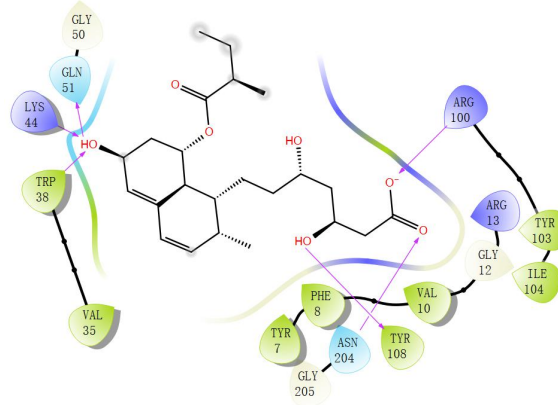

ZINC000009212427

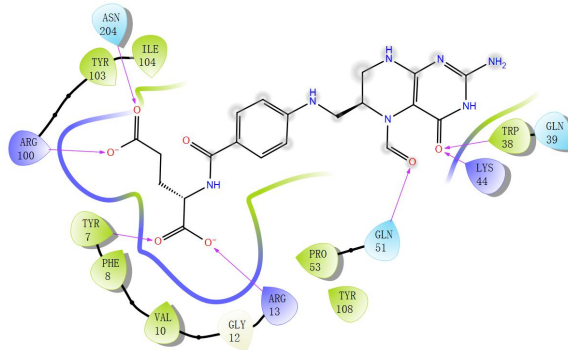

ZINC000003831121

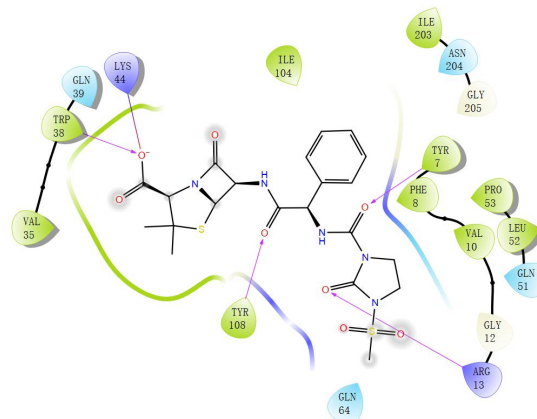

ZINC000003813078

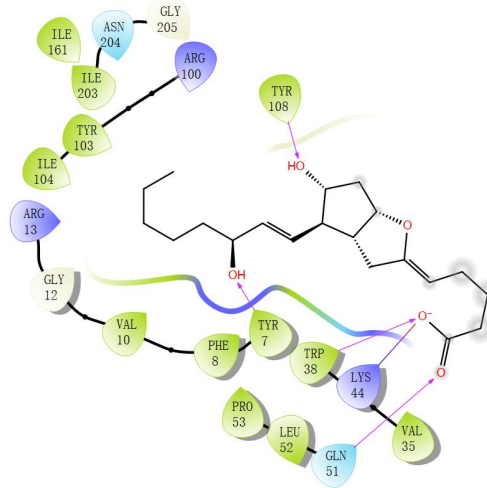

ZINC000003831358

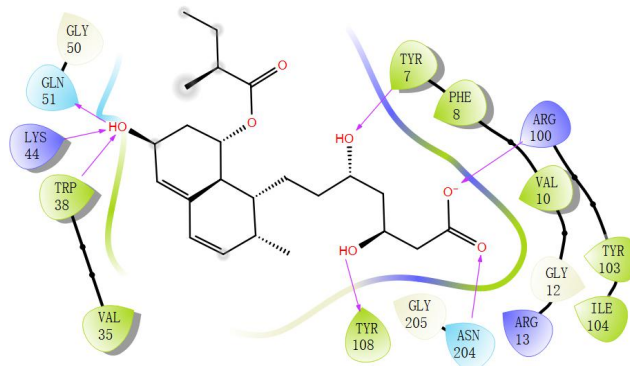

ZINC000003830707

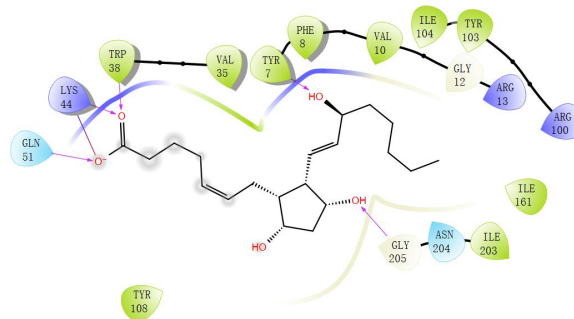

ZINC000001571045

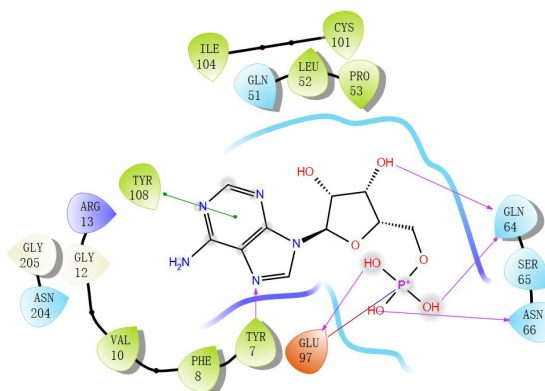

ZINC000003831151

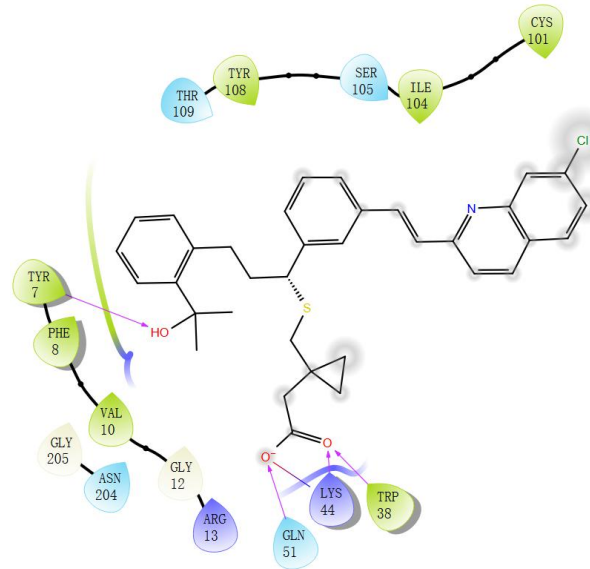

ZINC000000004785

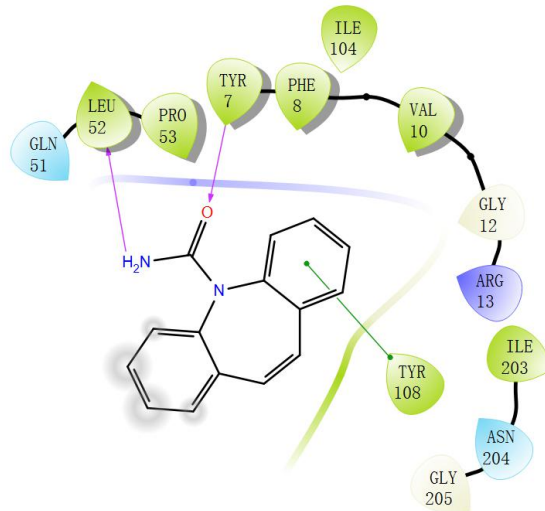

ZINC000001530776

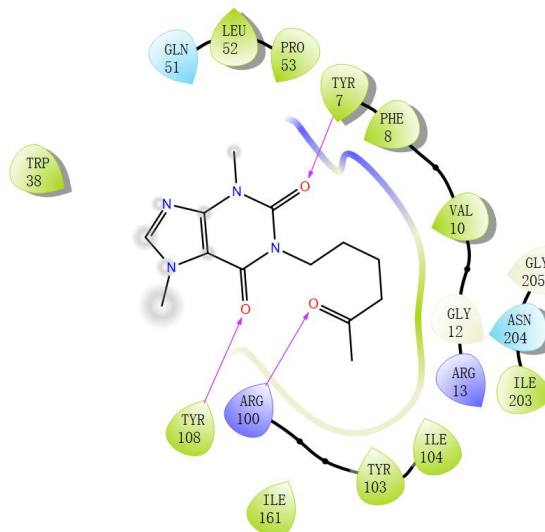



ZINC000008214703

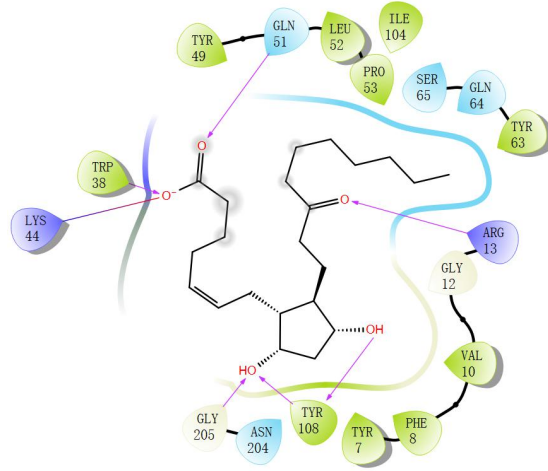

ZINC0000085537017

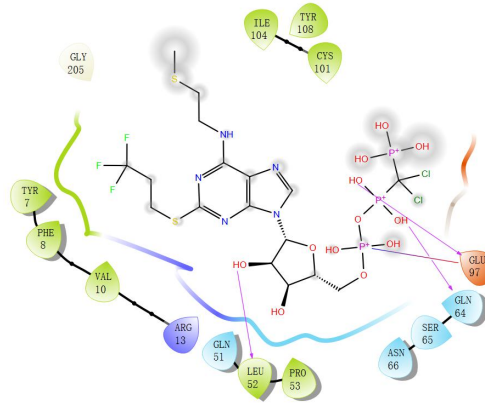

ZINC000000004724

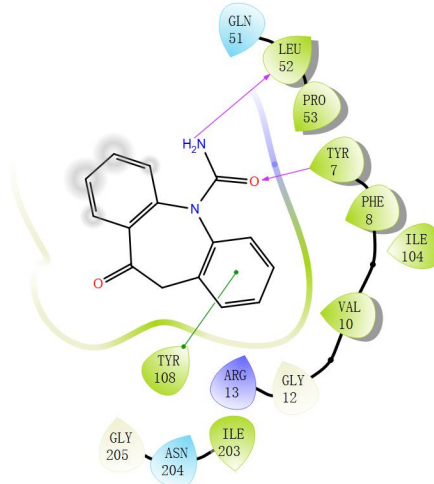



ZINC000003830435

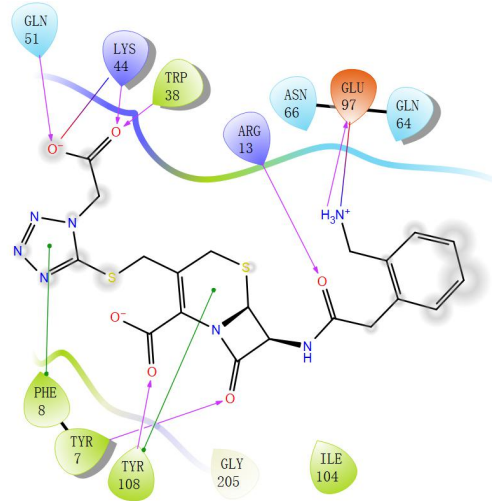

ZINC000000897225

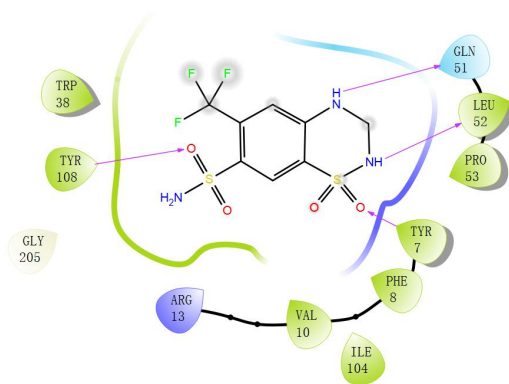

ZINC000003830520

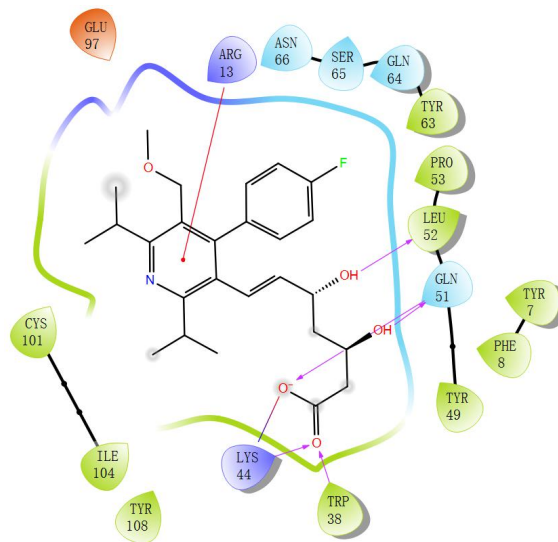

ZINC000028467879

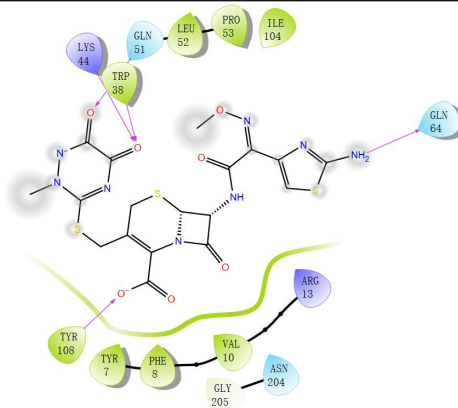

ZINC000003830850

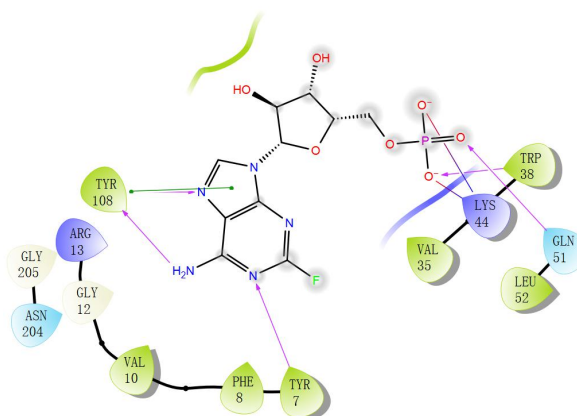

ZINC000003830434

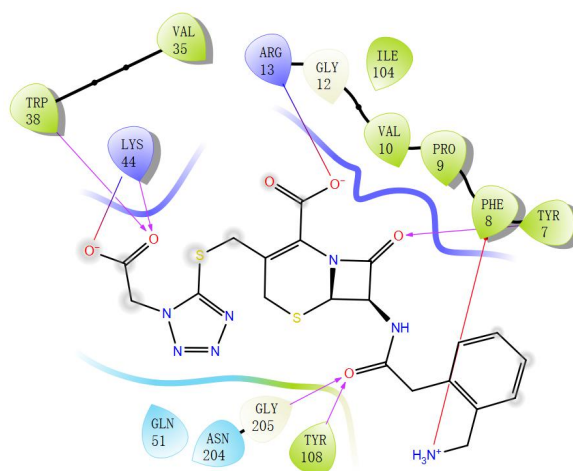

ZINC000003875334

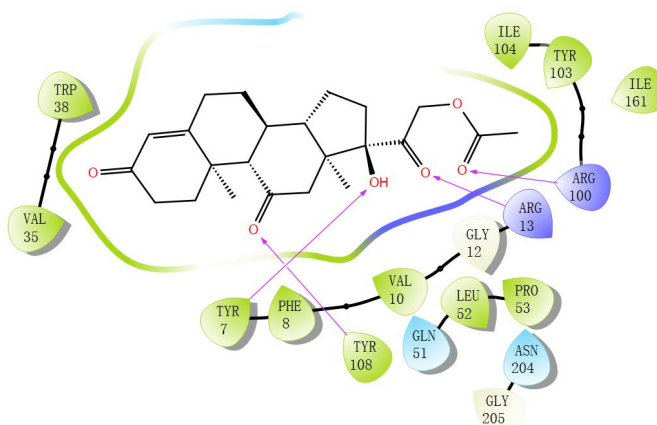

ZINC000031356637

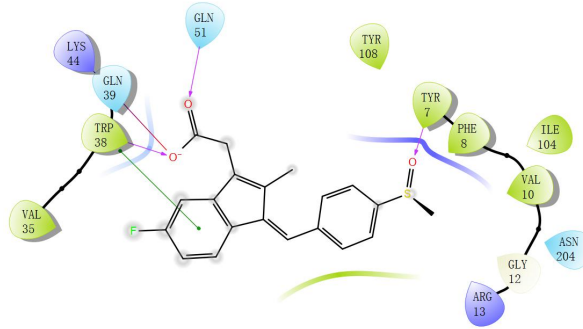

ZINC000008101062

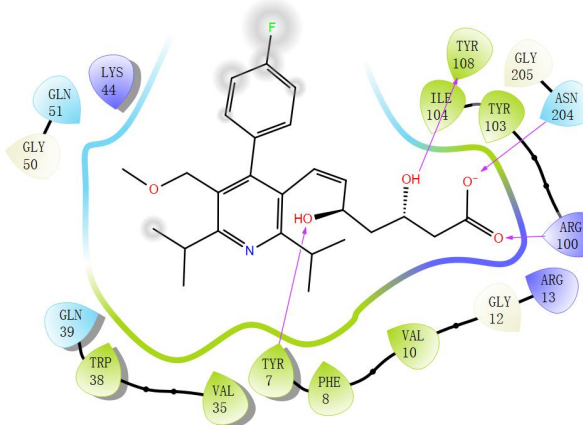

ZINC000001547851

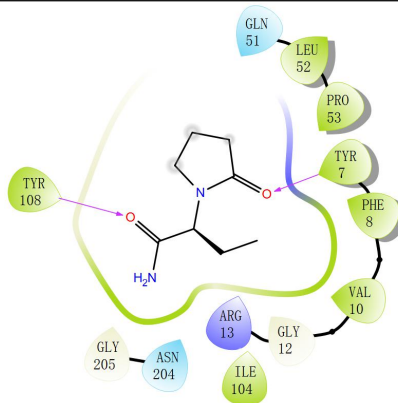

ZINC000003831150

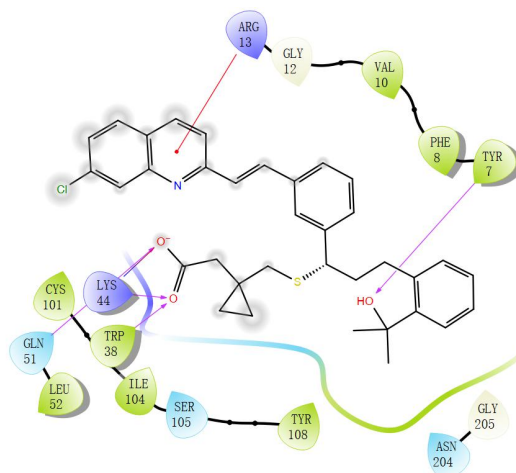

ZINC000004096261

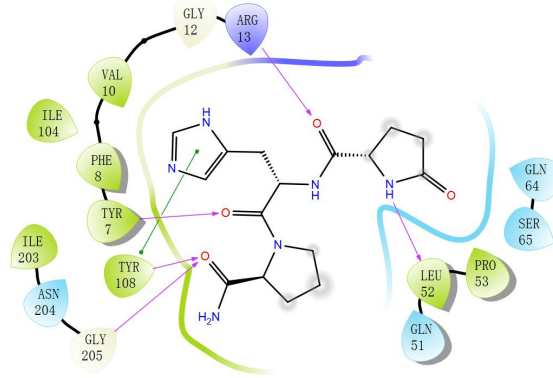

ZINC000003830848

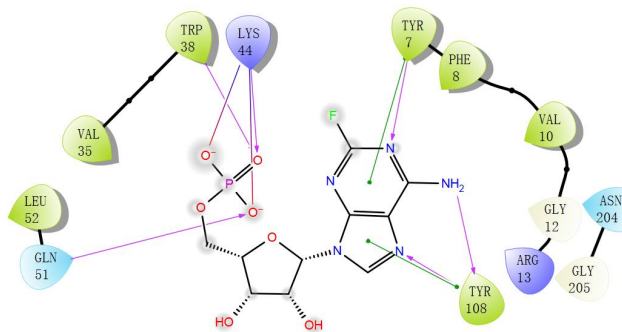

ZINC000003830469

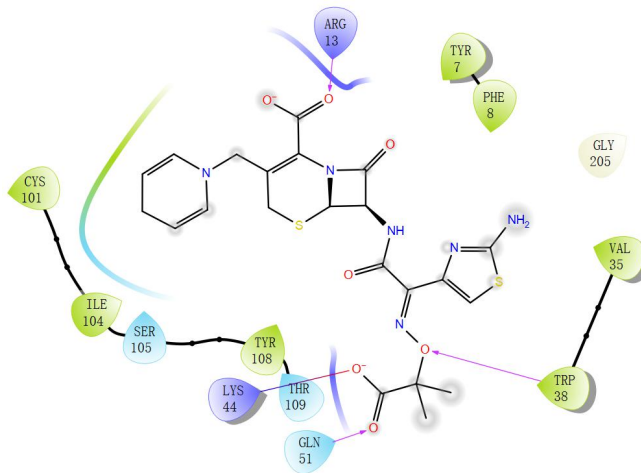

ZINC000049783788

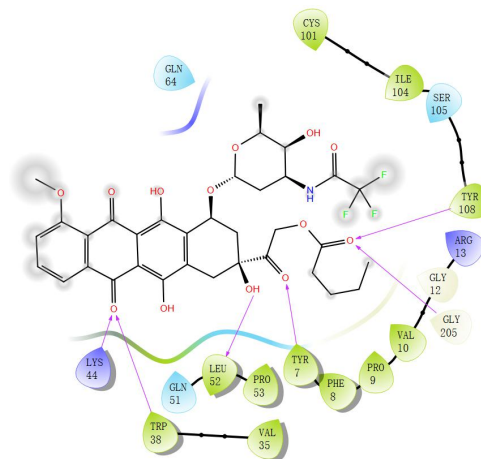

ZINC000001481815

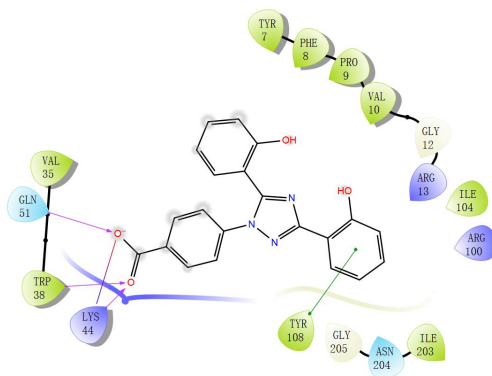

Supplement: d1nj04597k1.pdf [file d1nj04597k1.pdf]
